# Supplementary material for: Rapid on-site detection of paraquat in biologic fluids by iodide-facilitated pinhole shell-isolated nanoparticle-enhanced Raman spectroscopy
Source: Royal Society of Chemistry journal article supplement (doi:10.1039/c6ra06954a), 2016-01-01
Supplement: c6ra06954a1.pdf [file c6ra06954a1.pdf]

# **Rapid on-site detection of paraquat in biologic fluids by iodide-facilitated pinhole shell-isolated nanoparticle-enhanced Raman spectroscopy**

## **SUPPORTING INFORMATION**

**Yingjie Zhu,<sup>a</sup> Jianfeng Wu,<sup>a</sup> Haiyue Gao,<sup>a</sup> Guokun Liu,<sup>b</sup> Zhongqun Tian,<sup>c</sup>**

**Jianlin Feng,<sup>a</sup> Lei Guo,<sup>\*a</sup> and Jianwei Xie<sup>\*a</sup>**

**\* Correspondence to: Lei Guo (Dr.), State Key Laboratory of Toxicology and Medical Countermeasures, and Laboratory of Toxicant Analysis, Institute of Pharmacology and Toxicology, Academy of Military Medical Sciences, Beijing 100850, China.**

**E-mail: [guolei@bmi.ac.cn](mailto:guolei@bmi.ac.cn); Tel:86-10-66931650; Fax:86-10-68225893**

**\* Correspondence to: Jianwei Xie (Dr.), State Key Laboratory of Toxicology and Medical Countermeasures, and Laboratory of Toxicant Analysis, Institute of Pharmacology and Toxicology, Academy of Military Medical Sciences, Beijing 100850, China.**

**E-mail: [xiejw@bmi.ac.cn](mailto:xiejw@bmi.ac.cn); Tel.(Fax):86-10-68225893**

**<sup>a</sup> State Key Laboratory of Toxicology and Medical Countermeasures, and Laboratory of Toxicant Analysis, Institute of Pharmacology and Toxicology, Academy of Military Medical Sciences, Beijing 100850, China**

**<sup>b</sup> College of the Environment and Ecology, Xiamen University, Xiamen 361005, China**

**<sup>c</sup> State Key Laboratory of Physical Chemistry of Solid Surfaces, and College of Chemistry and Chemical Engineering, Xiamen University, Xiamen 361005, China**

## Characterization of the pinSHINs

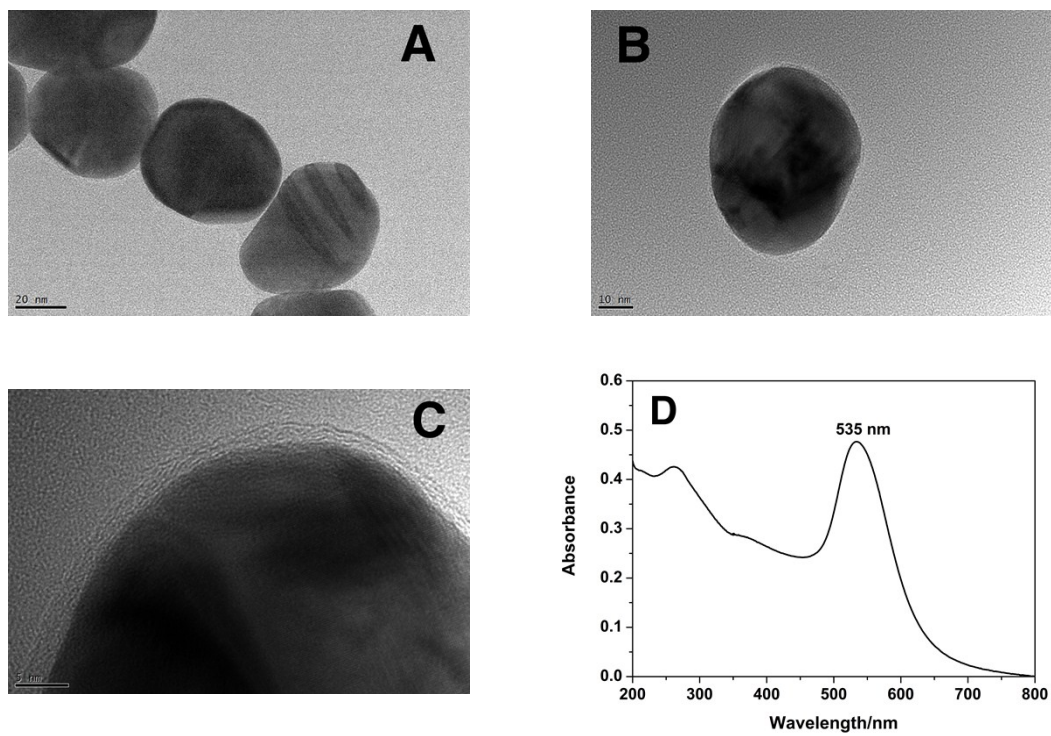

Fig. S1 HR-TEM images (A-C) and UV-Vis absorption spectra (D) of pinSHINs.

## *Influence of pH and different ions on paraquat measurement*

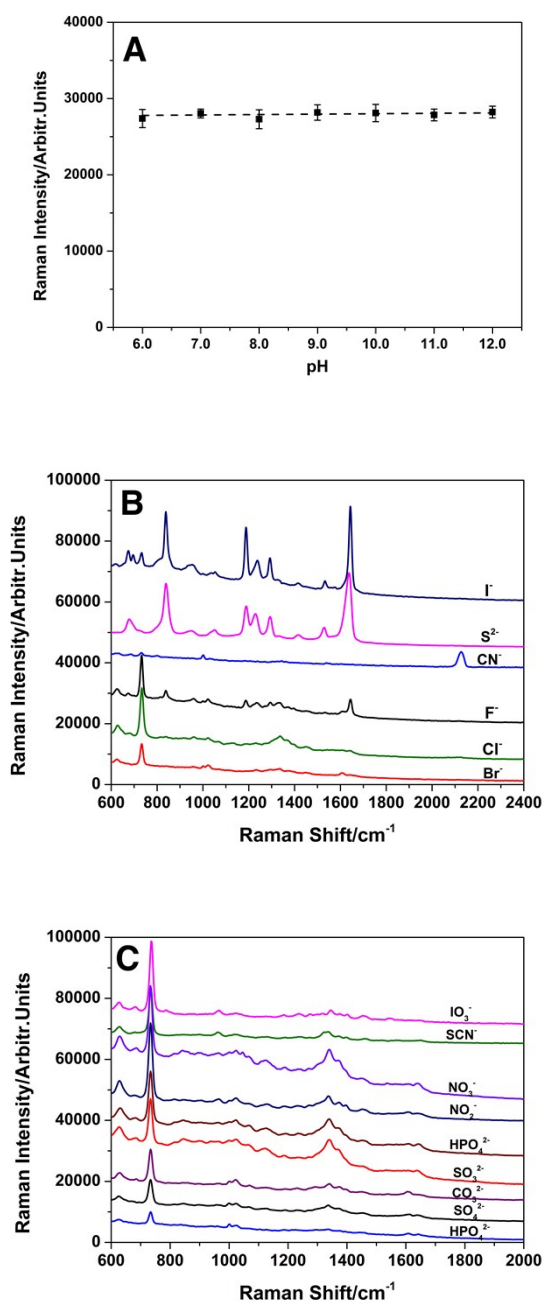

**Fig. S2** The plot of SERS intensity of paraquat ( $50 \mu\text{g L}^{-1}$ ) at  $1643 \text{ cm}^{-1}$  versus pH from 6.0 to 12.0. Each data point represents the average value of three SERS measurements (A). SERS spectra of paraquat in plasma ( $50 \mu\text{g L}^{-1}$ ) with the addition of different kind of anions at 100 mM (B and C).

## *Influence of iodide concentration on paraquat measurement*

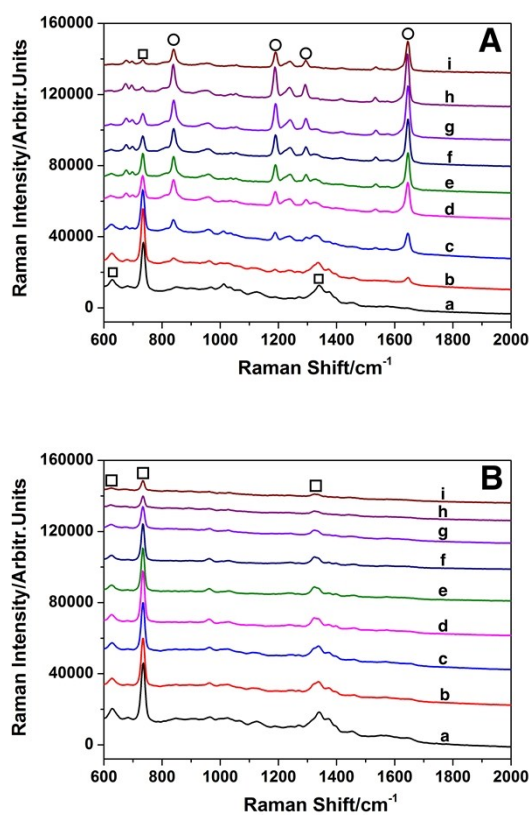

**Fig. S3** SERS spectra of paraquat in plasma (50 μg L<sup>-1</sup>) (A) and SERS spectra of blank plasma (B) with KI at concentration of 0, 0.1, 0.5, 1, 5, 10, 50, 100, 200 mM (a-i). (○) represents the characteristic peaks, and (□) represents inherent, nonspecific peaks induced by plasma.

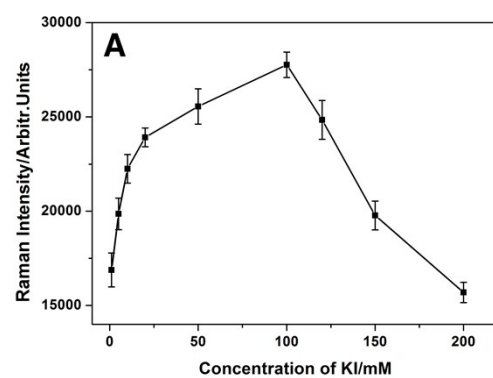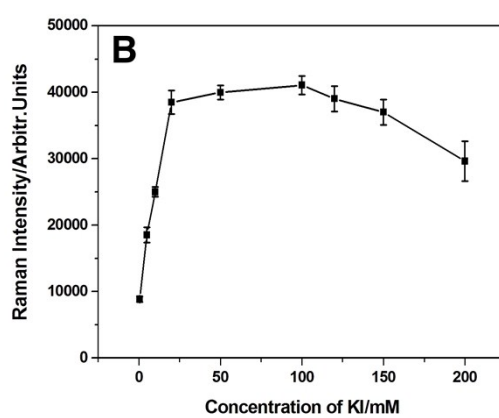

**Fig. S4** Influence of KI concentration (0.5, 5, 10, 20, 50, 100, 120, 150, 200 mM) on SERS intensity of paraquat ( $50 \mu\text{g L}^{-1}$ ) in plasma (A) and urine (B) at  $1643 \text{ cm}^{-1}$ .

## Comparison of the stability between pinSHINs and bare AuNPs

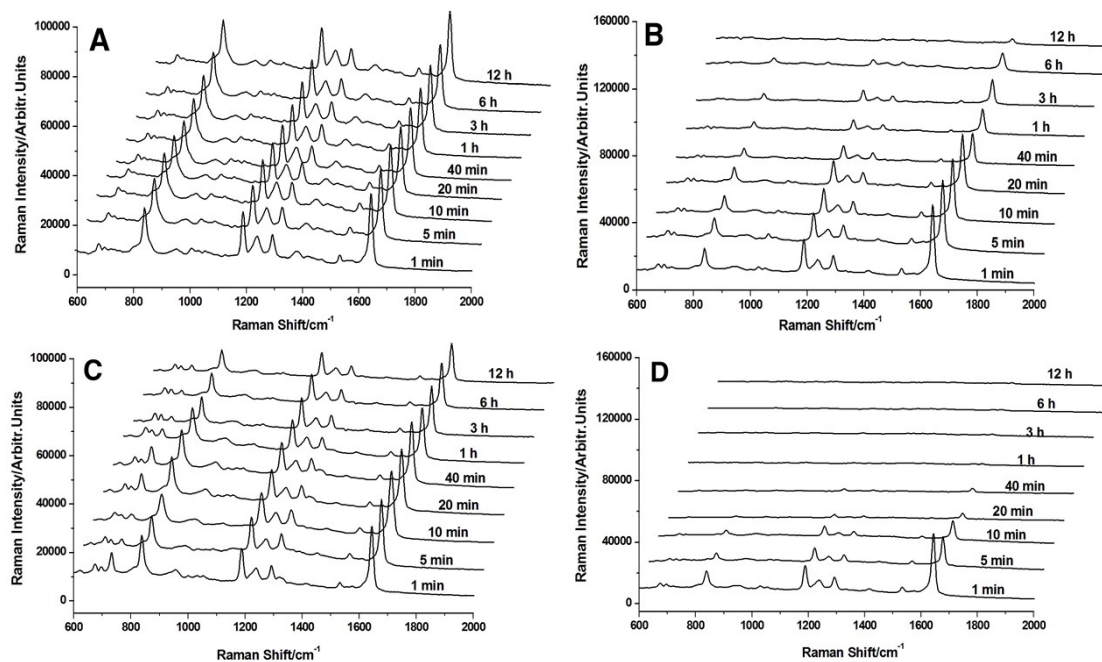

**Fig. S5** Time-dependent SERS spectra of pinSHINs in plasma (A) and urine (B). Time-dependent SERS spectra of bare AuNPs in plasma (C) and urine (D). The concentration of paraquat is  $50 \mu\text{g L}^{-1}$ .

## Recovery in plasma and urine samples

**Table S1** Measurement of paraquat in plasma and urine (n=3)

| Sample | Added paraquat<br>( $\mu\text{g L}^{-1}$ ) | Measured paraquat<br>( $\mu\text{g L}^{-1}$ ) | Recovery<br>(%) | RSD<br>(%) |
|--------|--------------------------------------------|-----------------------------------------------|-----------------|------------|
| Plasma | 2                                          | 2.3                                           | 115             | 8.2        |
|        | 20                                         | 21.7                                          | 109             | 6.6        |
|        | 30                                         | 33.0                                          | 110             | 2.7        |
| Urine  | 2                                          | 2.2                                           | 110             | 7.6        |
|        | 10                                         | 10.5                                          | 105             | 3.7        |
|        | 16                                         | 14.9                                          | 93              | 5.5        |

## *Serial dilution of real plasma sample*

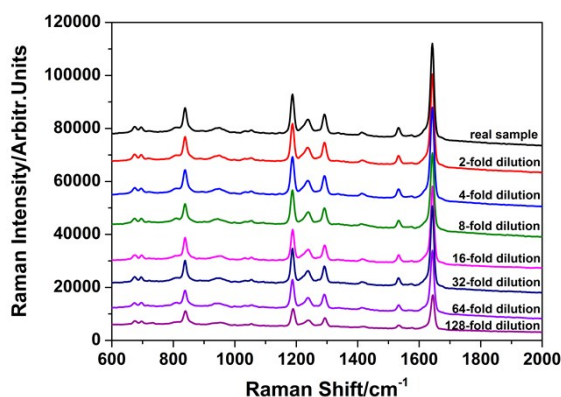

Fig. S6 SERS spectra of real plasma sample and serially diluted samples.

## *Applicability on other matrices*

To demonstrate the wide applicability of this method, we also examined on plasma and bronchoalveolar lavage fluid (BALF) of paraquat poisoned SD rats as well as food matrices including spiked milk and orange juice samples. Plasma and bronchoalveolar lavage fluid (BALF) of paraquat poisoned SD rats were kindly provided by Dr. Jian Zhao (Institute of Pharmacology and Toxicology, Academy of Military Medical Sciences). Briefly, the male SD rats were administered by the intraperitoneal injection of paraquat at a dose of 50 mg/kg and received bronchoalveolar lavage treatment with normal saline at 6 h, 12 h and 24 h. Plasma and BALF were collected after each lavage, and measured by this method. The male SD rats were purchased from Charles River Co. Ltd. (Beijing, China). All the animal experiments were performed under the guidelines of the Association of Laboratory Animal Care International (AAALAC).

Orange juice and milk were purchased from a local supermarket. Spiked food samples were prepared by the addition of standard solutions and serially diluted to obtain a final concentration ranged from 2 to 200  $\mu\text{g L}^{-1}$ .

As shown in Fig. S7, the amount of paraquat in plasma and BALF decreased largely after the third

lavage, indicating that this method could be readily applied to on-site detection of paraquat poisoning and even the evaluation of the treatment effects. This developed method is also applicable in orange juice and milk samples, reaching an LOD of  $2 \mu\text{g L}^{-1}$  level for both (Figure. S8). A linear relationship between the SERS intensity and paraquat concentration was observed in the range from 5 to  $50 \mu\text{g L}^{-1}$  for each kind of sample, with a recovery of paraquat between 92 and 115% (Table S2).

The results above show general applicability of this developed method in various matrices, meeting the on-site demand for paraquat measurement in biosamples and also other complex matrices.

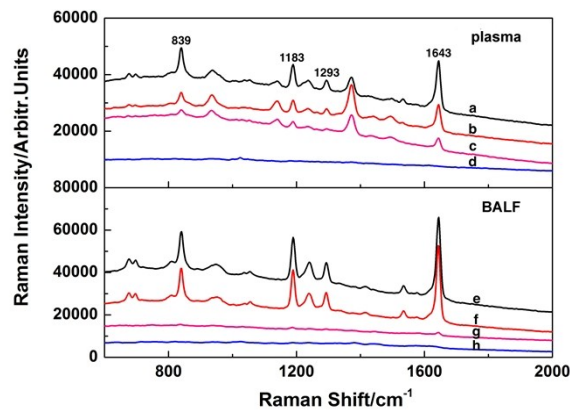

**Fig. S7** SERS spectra of the plasma of paraquat poisoned rats after bronchoalveolar lavage at 6 h (a), 12 h (b), 24 h (c), and blank rat (d); SERS spectra of the BALF of paraquat poisoned rats after lavage at 6 h (e), 12 h (f) and 24 h (g), and of blank rat (h).

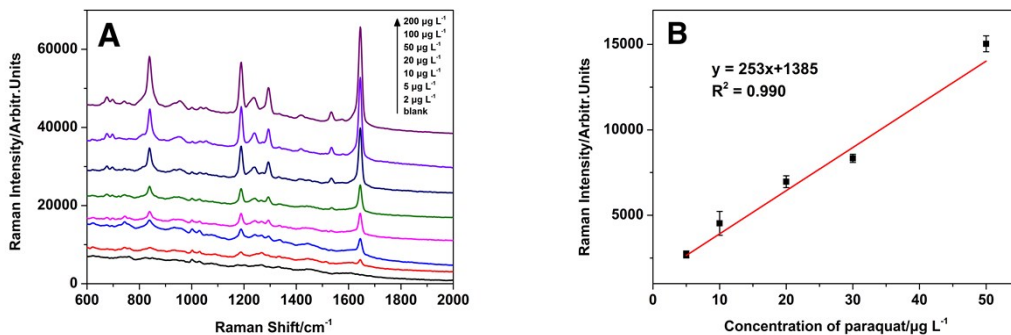



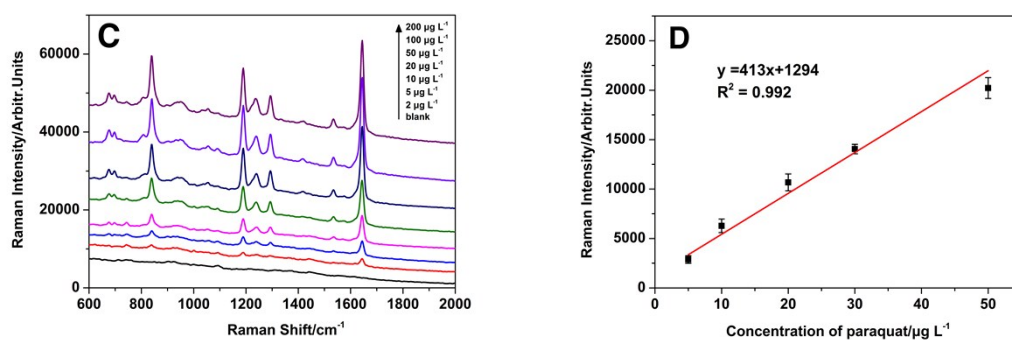

**Fig. S8** SERS spectra of paraquat in orange juice (A) and milk (C) at concentration from 2 to 200  $\mu\text{g L}^{-1}$  with 100 mM of KI; Calibration curves of SERS intensity at 1643  $\text{cm}^{-1}$  versus concentration of paraquat in orange juice (C) and milk (D) from 5 to 50  $\mu\text{g L}^{-1}$ .

**Table S2** Measurement of paraquat in orange juice and milk (n=3)

| Sample       | Added paraquat<br>( $\mu\text{g L}^{-1}$ ) | Measured paraquat<br>( $\mu\text{g L}^{-1}$ ) | Recovery<br>(%) | RSD<br>(%) |
|--------------|--------------------------------------------|-----------------------------------------------|-----------------|------------|
| Orange juice | 10                                         | 9.5                                           | 95              | 9.1        |
|              | 25                                         | 24.4                                          | 98              | 7.1        |
|              | 40                                         | 43.5                                          | 109             | 9.2        |
| Milk         | 10                                         | 11.4                                          | 114             | 5.8        |
|              | 25                                         | 22.9                                          | 92              | 10.2       |
|              | 40                                         | 45.8                                          | 115             | 4.4        |
